# Supplementary material for: Evaporation measurement and modelling of an alpine saline lake influenced by freeze–thaw on the Qinghai–Tibet Plateau
Source: Copernicus journal article supplement (doi:10.5194/hess-2023-100), 2023-06-07
Supplement: Supplementary file 1 [file hess-2023-100-supplement.pdf]

---

1 **ONLINE SUPPLEMENT TO:**

2 **Evaporation measurement and modeling of an alpine saline**  
3 **lake influenced by freeze–thaw on the Qinghai–Tibet Plateau**

4 Fangzhong Shi<sup>1,2</sup>, Xiaoyan Li<sup>1,2,3,4</sup>, Shaojie Zhao<sup>1,2</sup>, Yujun Ma<sup>5</sup>, Junqi Wei<sup>1,2</sup>, Qiwen Liao<sup>1,2</sup>, Deliang  
5 Chen<sup>6</sup>

6 <sup>1</sup>State Key Laboratory of Earth Surface Processes and Resource Ecology, Faculty of Geographical  
7 Science, Beijing Normal University, Beijing 100875, China;

8 <sup>2</sup>School of Natural Resources, Faculty of Geographical Science, Beijing Normal University, Beijing  
9 100875, China

10 <sup>3</sup>Key Laboratory of Tibetan Plateau Land Surface Processes and Ecological Conservation, Ministry of  
11 Education, Qinghai Normal University, Xining, China

12 <sup>4</sup>Academy of Plateau Science and Sustainability, Qinghai Normal University, Xining, China

13 <sup>5</sup>School of Geography and Planning, Sun Yat–sen University, Guangzhou, China

14 <sup>6</sup>Regional Climate Group, Department of Earth Sciences, University of Gothenburg, Gothenburg,  
15 Sweden.

16 \* To whom the correspondence should be addressed: Xiao–Yan Li, State Key Laboratory of Earth  
17 Surface Processes and Resource Ecology, Beijing Normal University, Beijing, China. Emails:  
18 xyli@bnu.edu.cn.

---

19 **Keywords**

20 Lake evaporation and sublimation, saline lakes, flux observation, ice-covered period,  
21 Qinghai Lake, Qinghai-Tibet Plateau

22 **Author Contributions**

23 XY Li conceived the idea, FZ Shi performed the analyses. XY Li, FZ Shi, DL Chen and  
24 YJ Ma led the manuscript writing. SJ Zhao, YJ Ma, JQ Wei and QW Liao provided  
25 analysis of datasets. All contributed to review and revise the manuscript.

26 **This PDF file includes:**

27 Supplementary Fig. S1 to S9

28 Supplementary Tables S1 to S3

29 **Figures**

30 **Fig. S1.**

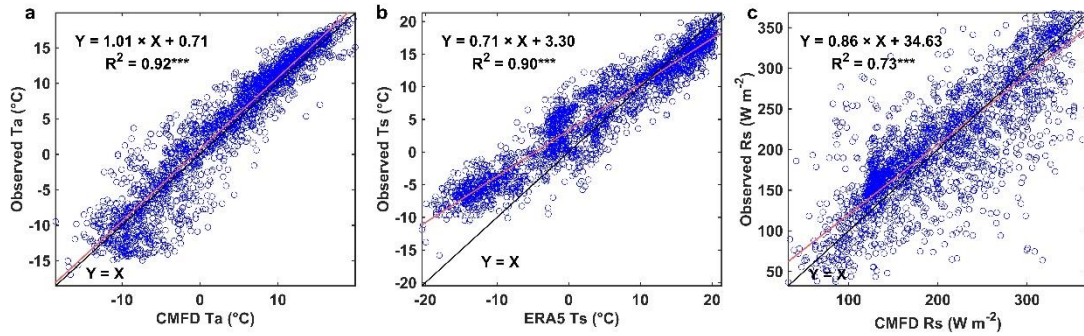

32 **Fig. S1. Relationship between the daily air temperature (Ta) from the China Regional High–**  
33 **Temporal–Resolution Surface Meteorological Elements–Driven Dataset (CMFD), lake surface**  
34 **temperature (Ts) from the interim reanalysis dataset v5 (ERA5) and downward shortwave**  
35 **radiation (Rs) from CMFD with the observed Ta (a), Ts (b) and Rs (c) in Qinghai Lake.**

36

37 Fig. S2.

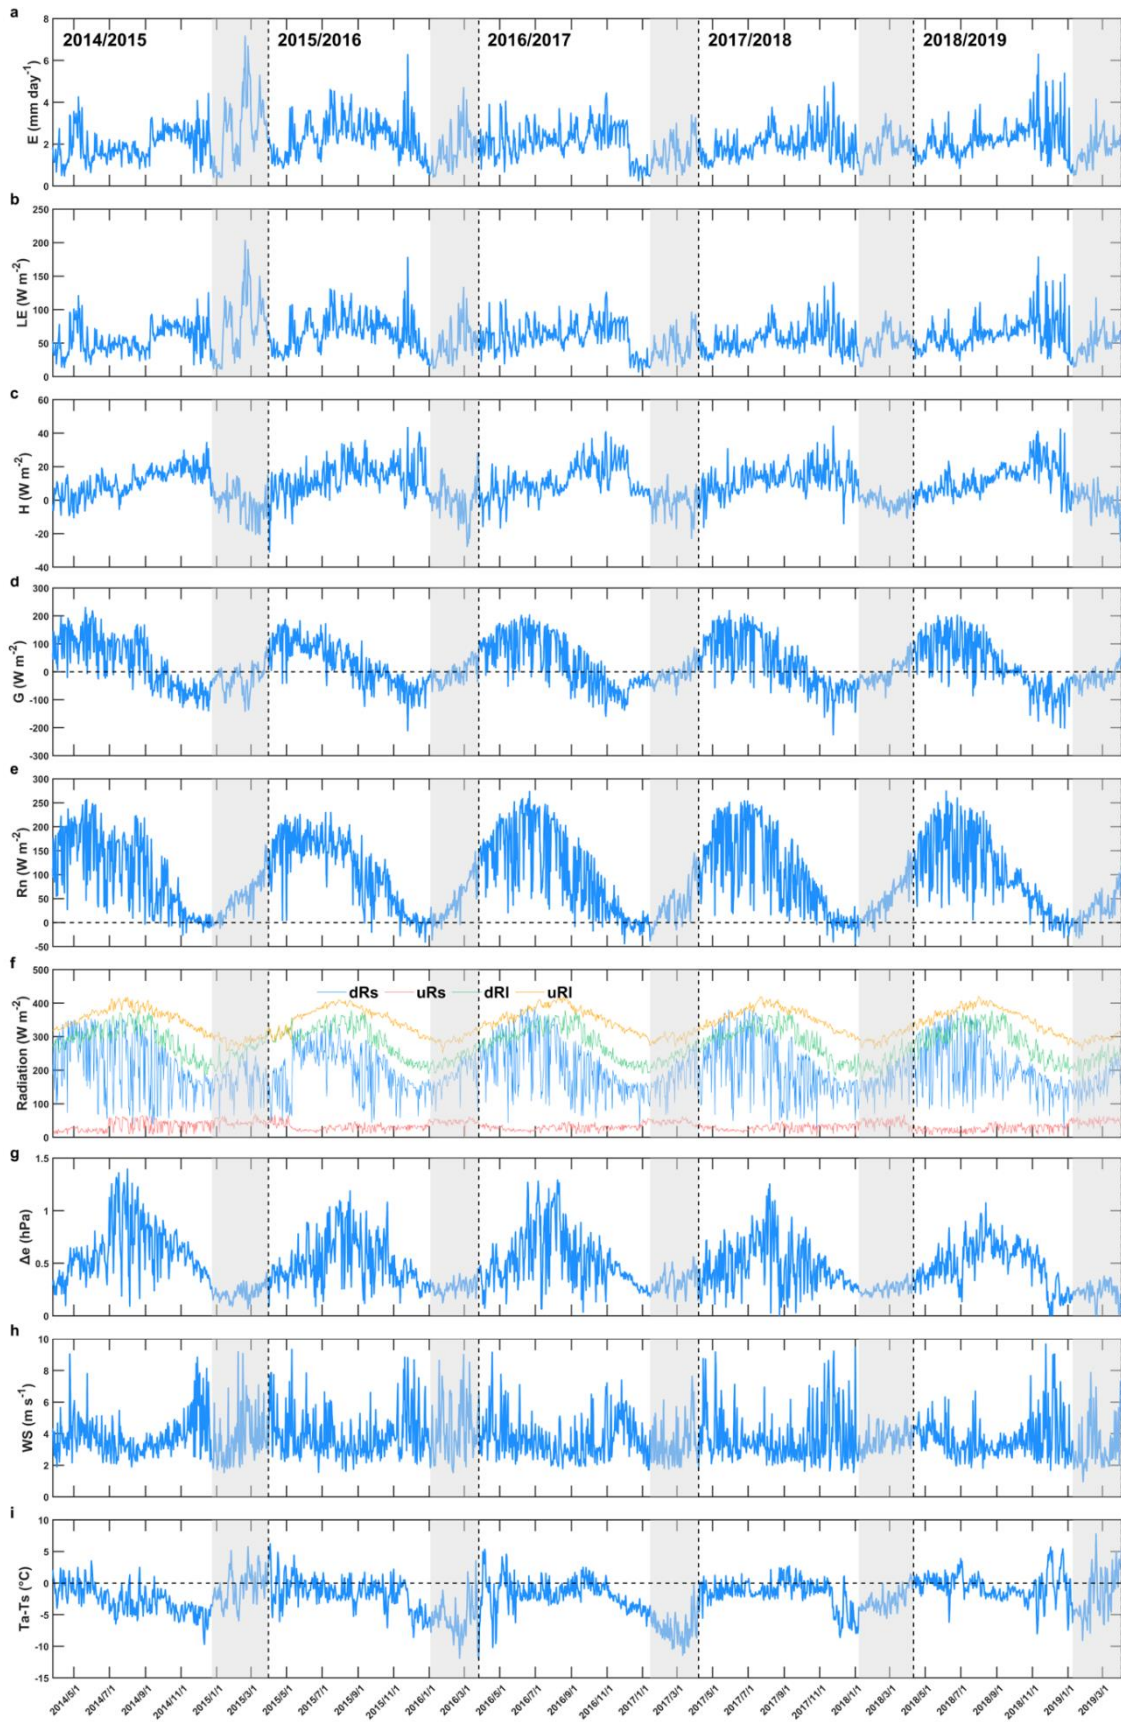

---

39 **Fig. S2. The time series of the daily lake evaporation (E), latent heat (LE), sensible**  
40 **heat (H), heat storage change (G), net radiation (Rn), four radiation components**  
41 **(incoming shortwave: dRs, reflected shortwave: uRs, and incoming and outgoing**  
42 **longwave radiation: dRI and uRI), vapor pressure difference ( $\Delta e$ ), wind speed (U),**  
43 **and the difference between air temperature and lake surface temperature ( $T_a - T_s$ )**  
44 **of Qinghai Lake (QHL) during the ice-free (IF) and ice-covered (IC) periods from**  
45 **2014 to 2018.** The gray area indicates ice-covered period. The labels 2014/2015, 2015/2016,  
46 2016/2017, 2017/2018 and 2018/2019 indicate the cycle year of freeze-thaw cycling

47 **Fig. S3.**

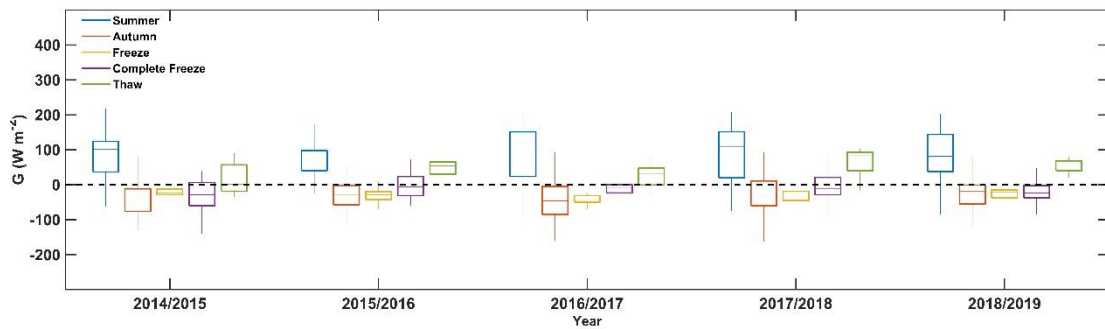

48

49 **Fig. S3. Heat storage change (G) in Qinghai Lake during summer, autumn, freeze, complete**  
50 **freeze and thaw periods in each year from 2014 to 2018.** The whiskers indicate the 1.5  
51 interquartile range. Summer and autumn last from June to August and September to November,  
52 respectively. The labels 2014/2015, 2015/2016, 2016/2017, 2017/2018 and 2018/2019 indicate the  
53 cycle year of freeze–thaw cycling.

54

55 **Fig. S4.**

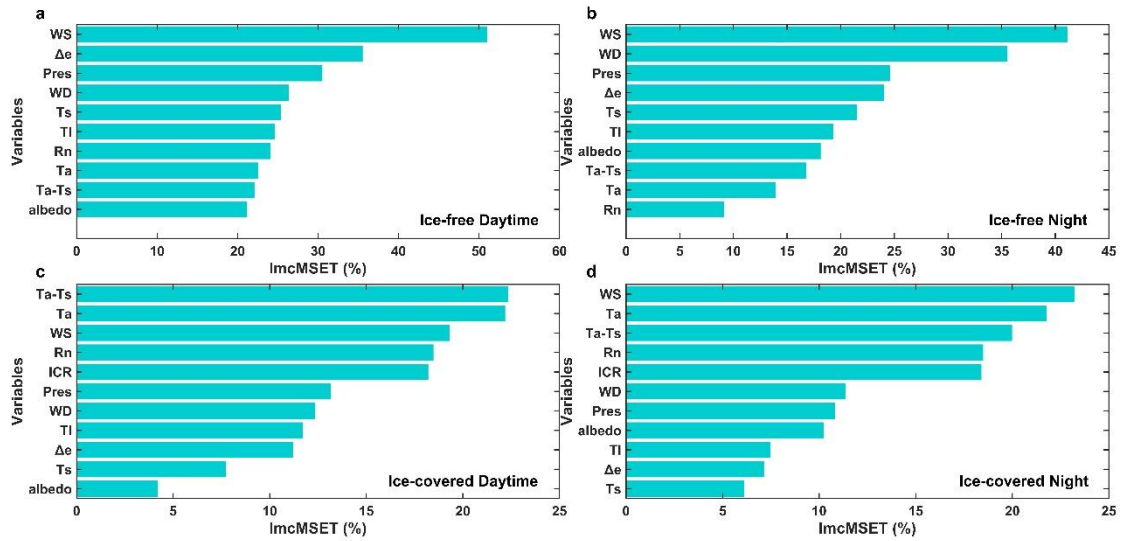

56

57 **Fig. S4. Importance of the daytime and nighttime climate factors to the evaporation (E) rate**  
 58 **of Qinghai Lake during the ice-free (IF) and ice-covered (IC) periods.** Rn, Δe, WS, WD, Pres,  
 59 Ta-Ts, TI and ICR denote the net radiation, vapor pressure difference, wind speed, wind direction,  
 60 surface air pressure, difference between the air and lake surface temperatures, average temperature  
 61 of the lake body from 0 to 300 cm and ice coverage rate, respectively.

62

63 Fig. S5.

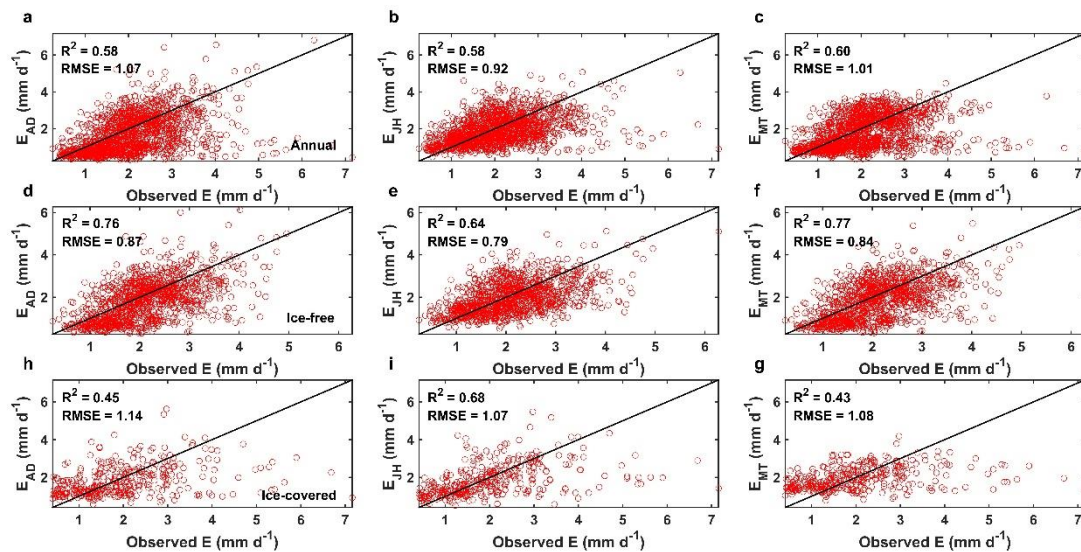

64

65 Fig. S5. Relationship between the observed daily observed and simulated evaporation ( $E$ ) with  
66 the atmospheric dynamics model ( $E_{AD}$ ), mass-transfer model ( $E_{MT}$ ) and Jensen-Haise model  
67 ( $E_{JH}$ ) in the cycle year (annual: AN, a-c), ice-free (IF, d-f) and ice-covered (IC, h-g) periods  
68 from 2014 to 2018.

69

70



71 Fig. S6.

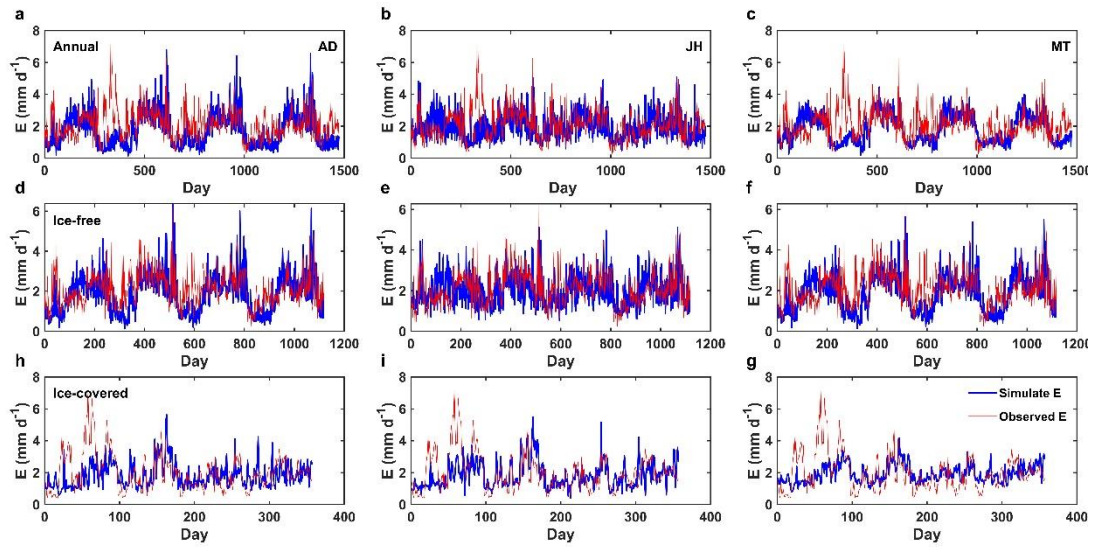

72

73 Fig. S6. Daily observed and simulated evaporation ( $E$ ) with the atmospheric dynamics model

74 ( $E_{AD}$ ), mass-transfer model ( $E_{MT}$ ) and Jensen-Haise model ( $E_{JH}$ ) in the cycle year (annual:

75 AN, a-c), ice-free (IF, d-f) and ice-covered (IC, h-g) periods from 2014 to 2018.

76

77

78 **Fig. S7.**

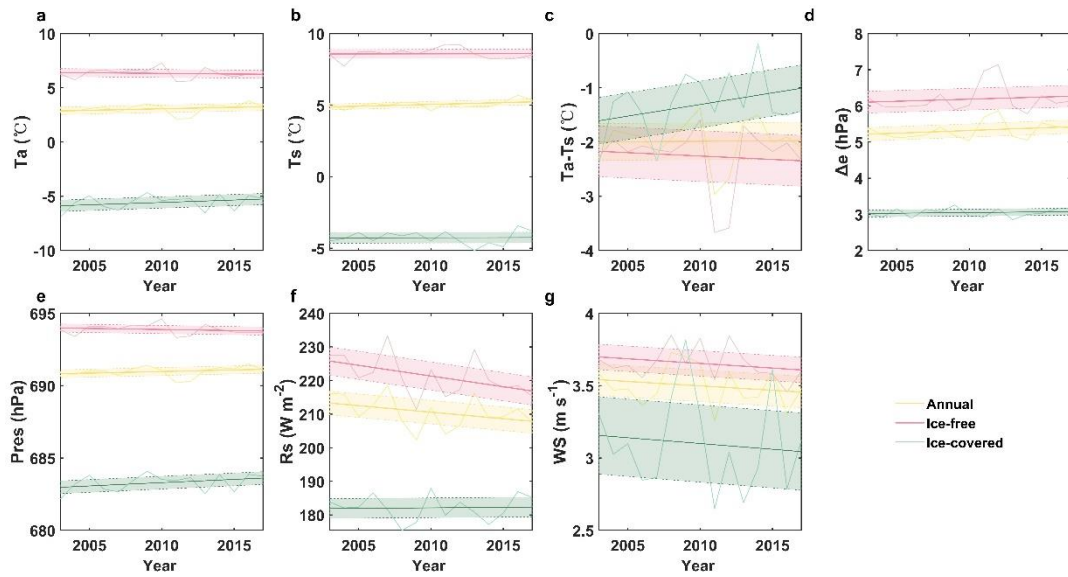

79

80 **Fig. S7. Interannual variability in the air temperature ( $T_a$ ), lake surface temperature ( $T_s$ ),**  
81 **difference between  $T_a$  and  $T_s$  ( $T_a - T_s$ ), vapor pressure difference ( $\Delta e$ ), air pressure (Pres),**  
82 **downward shortwave radiation ( $R_s$ ) and wind speed (WS) in the cycle year (annual: AN), ice-**  
83 **free (IF) and ice-covered (IC) periods from 2003 to 2017. The shading indicates the 95%**  
84 **confidence interval of the trend line.**

85 Fig. S8.

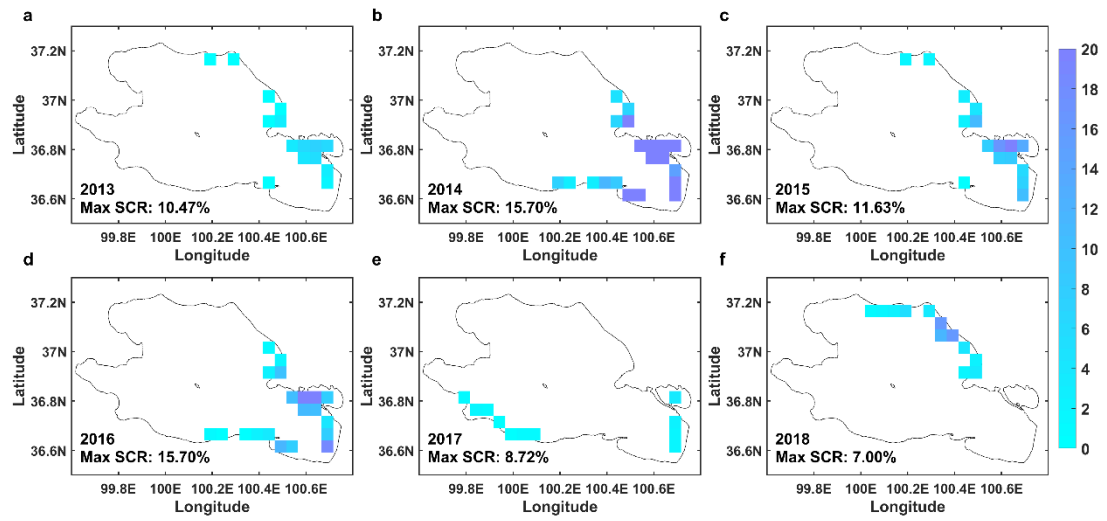

86

87 Fig. S8. Spatial distribution of average snow depth (cm) in Qinghai Lake from 2013 to 2018.

88 Max SCR means the maximal snow coverage rate.

89

90 Fig. S9.

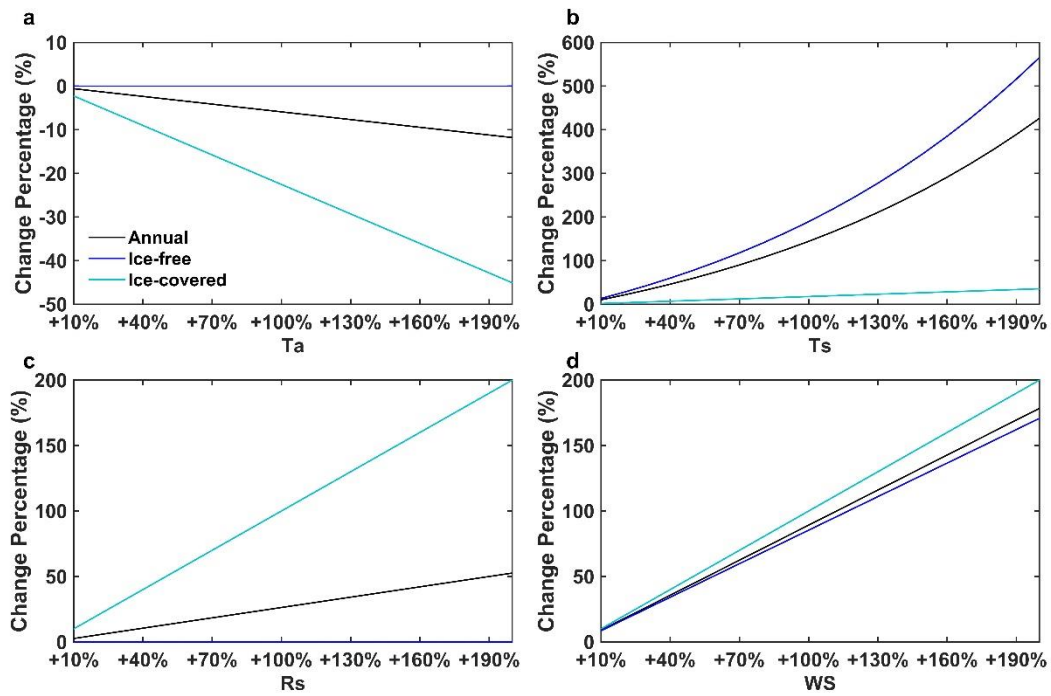

91

92 Fig. S9. Sensitivity of E to air temperature ( $T_a$ ), lake surface temperature ( $T_s$ ), downward  
93 shortwave radiation ( $R_s$ ) and wind speed (WS) to the simulated evaporation (E) of Qinghai  
94 Lake (QHL) in the cycle year (annual: AN), ice-free (IF) and ice-covered (IC) periods from  
95 2003 to 2017.

---

## TABLES

**Table S1.** Daily mean evaporation of Qinghai Lake (QHL) in the cycle year (annual: AN), ice-free (IF) and ice-covered (IC) periods from 2014 to 2018.

| Daily mean evaporation (mm d <sup>-1</sup> )   |             |             |             |             |             |
|------------------------------------------------|-------------|-------------|-------------|-------------|-------------|
| Periods                                        | 2014        | 2015        | 2016        | 2017        | 2018        |
| AN                                             | 2.16 ± 1.07 | 2.21 ± 0.93 | 2.02 ± 0.81 | 1.96 ± 0.69 | 2.10 ± 0.81 |
| IF                                             | 1.96 ± 0.73 | 2.34 ± 0.89 | 2.15 ± 0.79 | 1.99 ± 0.70 | 2.24 ± 0.81 |
| IC                                             | 2.71 ± 1.55 | 1.77 ± 0.93 | 1.57 ± 0.72 | 1.85 ± 0.62 | 1.72 ± 0.67 |
| Daytime mean evaporation (mm d <sup>-1</sup> ) |             |             |             |             |             |
| Periods                                        | 2014        | 2015        | 2016        | 2017        | 2018        |
| AN                                             | 1.21 ± 0.60 | 1.30 ± 0.62 | 1.11 ± 0.46 | 1.11 ± 0.43 | 1.18 ± 0.48 |
| IF                                             | 1.10 ± 0.44 | 1.36 ± 0.61 | 1.18 ± 0.44 | 1.12 ± 0.45 | 1.23 ± 0.49 |
| IC                                             | 1.52 ± 0.83 | 1.08 ± 0.59 | 0.87 ± 0.45 | 1.09 ± 0.37 | 1.01 ± 0.41 |
| Night mean evaporation (mm d <sup>-1</sup> )   |             |             |             |             |             |
| Periods                                        | 2014        | 2015        | 2016        | 2017        | 2018        |
| AN                                             | 0.95 ± 0.56 | 0.91 ± 0.45 | 0.91 ± 0.48 | 0.84 ± 0.36 | 0.93 ± 0.42 |
| IF                                             | 0.87 ± 0.38 | 0.98 ± 0.43 | 0.97 ± 0.49 | 0.87 ± 0.37 | 1.00 ± 0.42 |
| IC                                             | 1.18 ± 0.85 | 0.69 ± 0.46 | 0.70 ± 0.38 | 0.77 ± 0.32 | 0.72 ± 0.36 |

**Table S2.** Multiyear average contributions of the changes in air temperature (Ta), lake surface temperature (Ts), downward shortwave radiation (Rs) and wind speed (WS) to the simulated evaporation of Qinghai Lake in the cycle year (annual: AN), ice-free (IF) and ice-covered (IC) periods from 2003 to 2017.

|                      | Ta          | Ts            | Rs           | WS             |
|----------------------|-------------|---------------|--------------|----------------|
| E Rate in AN (mm)    | 0.01 ± 0.02 | 0.01 ± 0.05   | -0.02 ± 0.01 | -0.05 ± 0.08   |
| E Rate in IF (mm)    | 0.00 ± 0.00 | 0.04 ± 0.07   | 0.00 ± 0.00  | -0.01 ± 0.05   |
| E Rate in IC (mm)    | 0.05 ± 0.06 | -0.06 ± 0.04  | -0.06 ± 0.04 | -0.16 ± 0.21   |
| Sum E in AN (mm)     | 4.90 ± 6.14 | 4.35 ± 19.29  | -6.17 ± 4.77 | -18.92 ± 27.55 |
| Sum E in IF (mm)     | 0.00 ± 0.00 | 10.19 ± 19.00 | 0.00 ± 0.00  | -2.69 ± 12.99  |
| Sum E in IC (mm)     | 4.90 ± 6.14 | -5.84 ± 3.54  | -6.17 ± 4.77 | -16.23 ± 20.79 |
| Percentage in AN (%) | 0.92 ± 0.00 | 2.03 ± 2.20   | 0.89 ± 0.65  | 3.75 ± 2.66    |
| Percentage in IF (%) | 0.00 ± 0.00 | 3.11 ± 3.19   | 0.00 ± 0.00  | 1.90 ± 1.62    |
| Percentage in IC (%) | 3.52 ± 2.46 | 3.37 ± 1.27   | 3.19 ± 2.30  | 11.14 ± 6.23   |

**Table S3.** Lake ice phenology of Qinghai Lake from 2002 to 2018.

|      | IFS       | FUS        | FUE        | BES       | BUE       | LIF | LIC | LCY |
|------|-----------|------------|------------|-----------|-----------|-----|-----|-----|
| 2002 |           | 2002/12/25 | 2003/1/4   | 2003/3/26 | 2003/3/30 |     | 96  |     |
| 2003 | 2003/3/31 | 2003/12/25 | 2004/1/3   | 2004/3/13 | 2004/3/28 | 270 | 95  | 365 |
| 2004 | 2004/3/29 | 2004/12/27 | 2005/1/8   | 2005/3/14 | 2005/3/30 | 274 | 94  | 368 |
| 2005 | 2005/3/31 | 2005/12/16 | 2005/12/24 | 2006/3/28 | 2006/4/6  | 261 | 112 | 373 |
| 2006 | 2006/4/7  | 2006/12/26 | 2007/1/11  | 2007/3/30 | 2007/4/3  | 264 | 99  | 363 |
| 2007 | 2007/4/4  | 2007/12/27 | 2008/1/17  | 2008/3/31 | 2008/4/11 | 268 | 107 | 375 |
| 2008 | 2008/4/12 | 2008/12/22 | 2009/1/1   | 2009/3/20 | 2009/3/30 | 255 | 99  | 354 |
| 2009 | 2009/3/31 | 2009/12/24 | 2010/1/1   | 2010/3/20 | 2010/4/2  | 269 | 100 | 369 |
| 2010 | 2010/4/3  | 2010/12/16 | 2010/12/31 | 2011/4/5  | 2011/4/15 | 258 | 121 | 379 |
| 2011 | 2011/4/16 | 2011/12/21 | 2012/1/6   | 2012/4/1  | 2012/4/14 | 250 | 116 | 366 |
| 2012 | 2012/4/15 | 2012/12/12 | 2012/12/27 | 2013/3/24 | 2013/4/3  | 242 | 113 | 355 |
| 2013 | 2013/4/4  | 2013/12/20 | 2014/1/8   | 2014/3/3  | 2014/3/25 | 261 | 96  | 357 |
| 2014 | 2014/3/26 | 2014/12/23 | 2015/1/4   | 2015/3/14 | 2015/3/29 | 273 | 97  | 370 |
| 2015 | 2015/3/30 | 2015/12/31 | 2016/1/22  | 2016/3/12 | 2016/3/22 | 277 | 83  | 360 |
| 2016 | 2016/3/23 | 2017/1/9   | 2017/1/23  | 2017/3/18 | 2017/4/1  | 293 | 83  | 376 |
| 2017 | 2017/4/2  | 2017/12/31 | 2018/1/10  | 2018/3/29 | 2018/4/3  | 274 | 94  | 368 |
| 2018 | 2018/4/4  | 2018/12/31 | 2019/1/10  | 2019/3/29 | 2019/4/3  | 272 | 94  | 366 |

Note: IFS, FUS, FUE, BUS and BUE show the dates of ice-free start, freeze-up start, freeze-up end, break-up start and break-up end, respectively. LIF, LIC and LCY means the length of the ice-free period, ice-covered period and the cycle year (annual: AN), respectively. The ice-covered rate data are from the National Tibetan Plateau Data Center (<https://data.tpdc.ac.cn/zh-hans/data/c242394c-fe1a-4840-9beb-0bf4a95d1231/?q=%E6%B9%96%E5%86%B0%E7%89%A9%E5%80%99>).
